# Supplementary material
Source: ML conference proceedings conference paper supplement (https://proceedings.mlr.press/v189/hachiya23a.html)
Supplement: Supplementary file [file hachiya23a-supp.pdf]

# Supplementary Materials of position-dependent partial convolutions for supervised spatial interpolation

**Hiroataka Hachiya**

HHACHIYA@WAKAYAMA-U.AC.JP

*Graduate School of Systems Engineering, Wakayama University/Center for AIP, RIKEN*

**Kotaro Nagayoshi**

NAGAYOSHI.KOTARO@G.WAKAYAMA-U.JP

*Graduate School of Systems Engineering, Wakayama University/Center for AIP, RIKEN*

**Asako Iwaki**

IWAKI@BOSAI.GO.JP

*National Research Institute for Earth Science and Disaster Resilience*

**Takahiro Maeda**

TMAEDA@BOSAI.GO.JP

*National Research Institute for Earth Science and Disaster Resilience*

**Naonori Ueda**

NAONORI.UEDA@RIKEN.JP

*Center for AIP, RIKEN*

**Hiroyuki Fujiwara**

FUJIWARA@BOSAI.GO.JP

*National Research Institute for Earth Science and Disaster Resilience*

**Editors:** Emtiyaz Khan and Mehmet Gönen

## 1. Additional information of classical spatial interpolation methods

Triangles used in classical interpolation methods, e.g., IDW and Kriging, are generated by Delaunay triangulation, as shown in Fig. 1.

## 2. Additional information of ground-motion data

Ground-motion simulation is a numerical computation (finite-difference) of seismic wave propagation from the earthquake source to the ground surface within a 3-D medium, as shown in the schematic drawing in Fig. 2.

## 3. Additional examples of spatial interpolation in motion data

Fig. 3, Fig. 5 and Fig. 7 depict examples of masked image  $Y \odot M$ , true image  $Y$ , and interpolated image  $\hat{Y}$ . In addition, Fig. 4, Fig. 6 and Fig. 8 depict true vs. predicted values. Figures show that given extremely sparse observed values (b), our proposed method, PoDIM (f), can produce fine-grained interpolated images which look much similar to the true one (a) and have higher PSNR scores than existing methods.

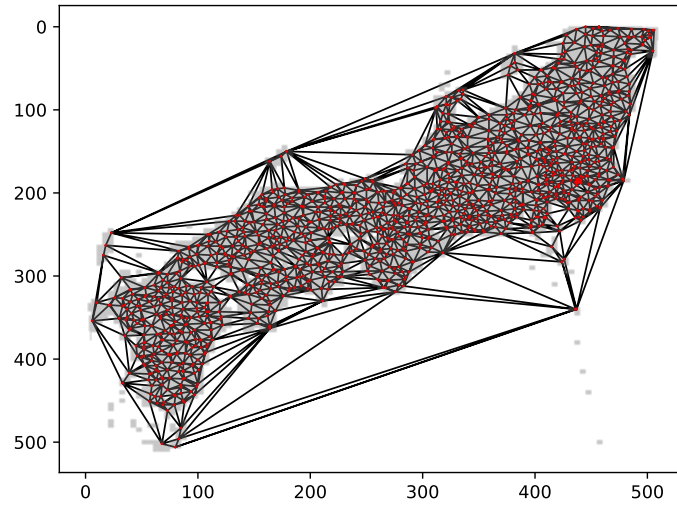

Figure 1: Delaunay triangulation split using `scipy.spatial.Delaunay` for strong motion stations K-NET and KiK-net in Fig. 1(a)subfigure (a).

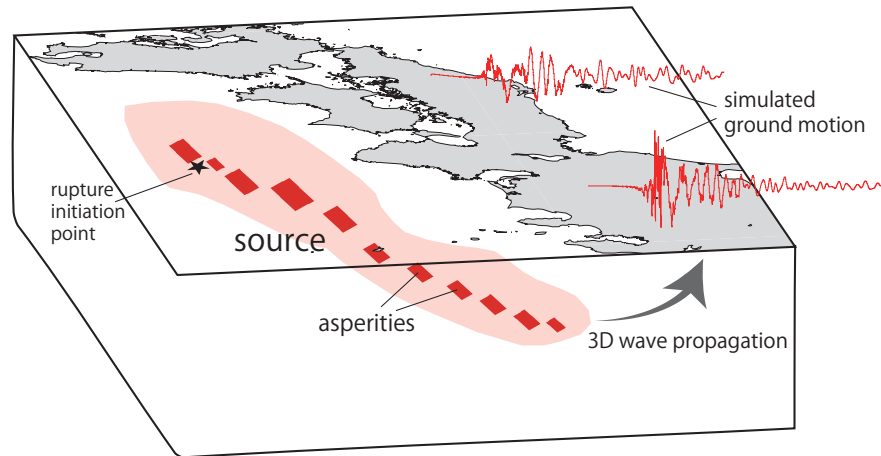

Figure 2: Schematic drawing of 3-D earthquake ground-motion simulation. The configuration of the earthquake source drawn on the map is exaggerated to improve visibility.

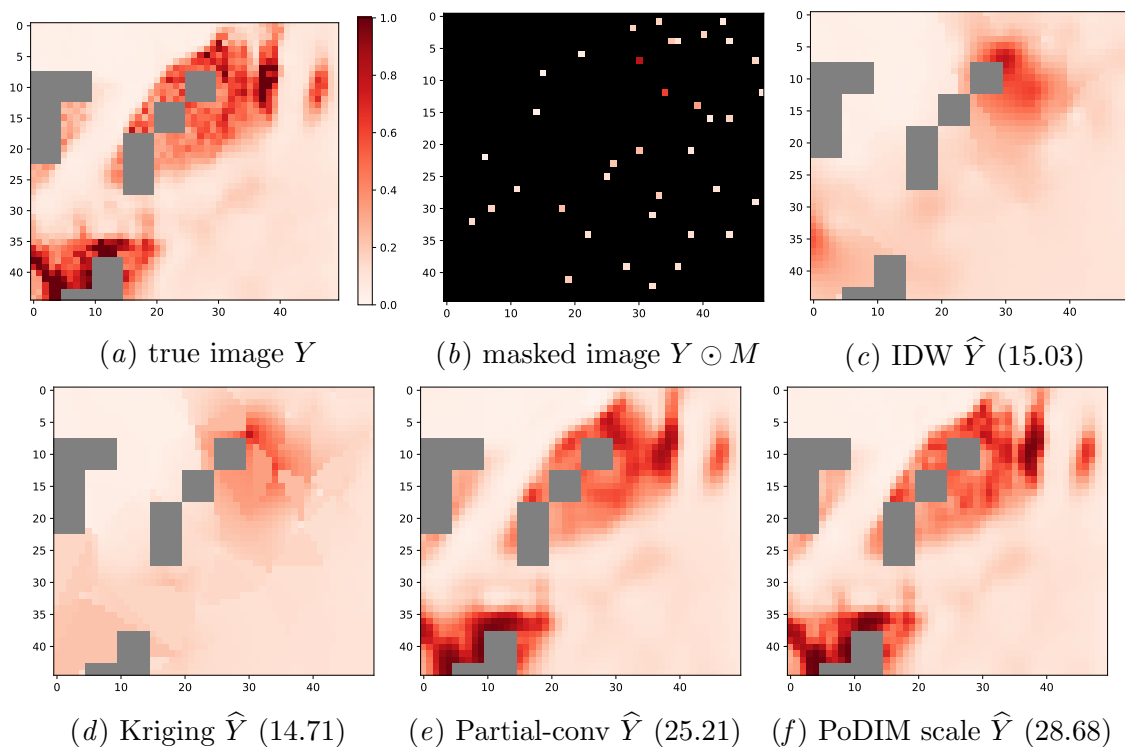

Figure 3: Examples of an enlarged version of Fig. 7 for Osaka region in Japan with the longitude from 134.93 to 136.03 and the latitude from 34.05 to 34.87.

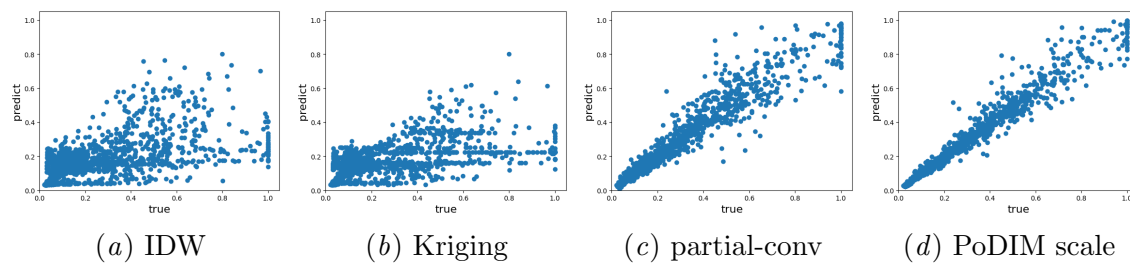

Figure 4: True vs. predicted values for Fig. 3.

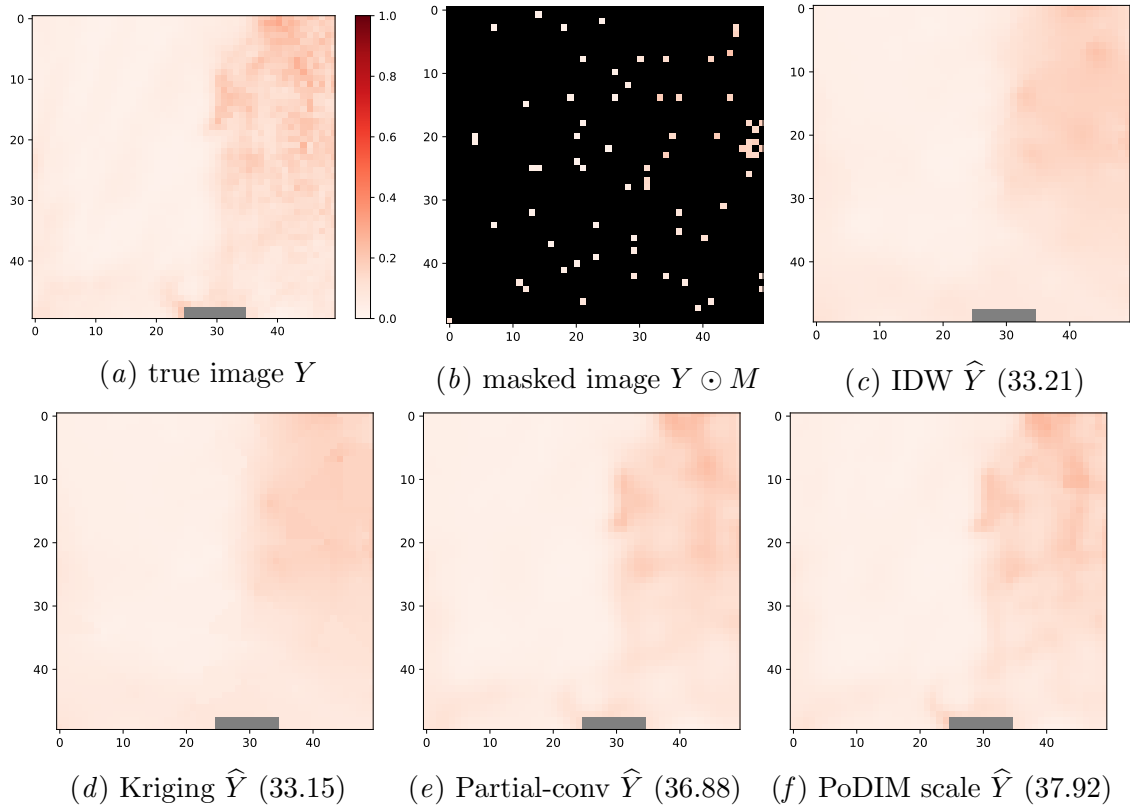

Figure 5: Examples of enlarged version of Fig. 7 in the manuscript for Tokyo region in Japan.

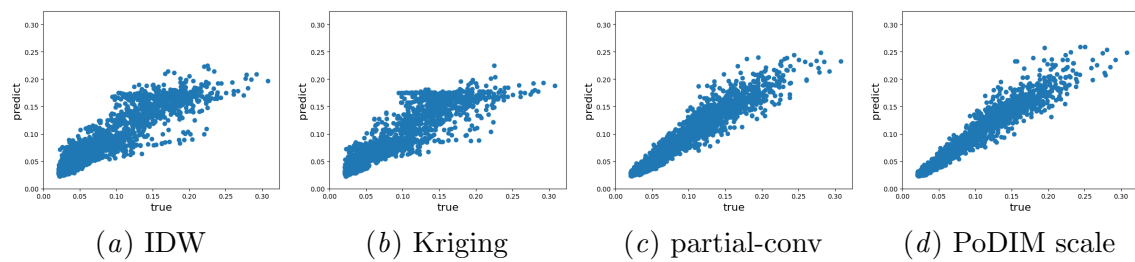

Figure 6: True vs. predicted values for Fig. 5.

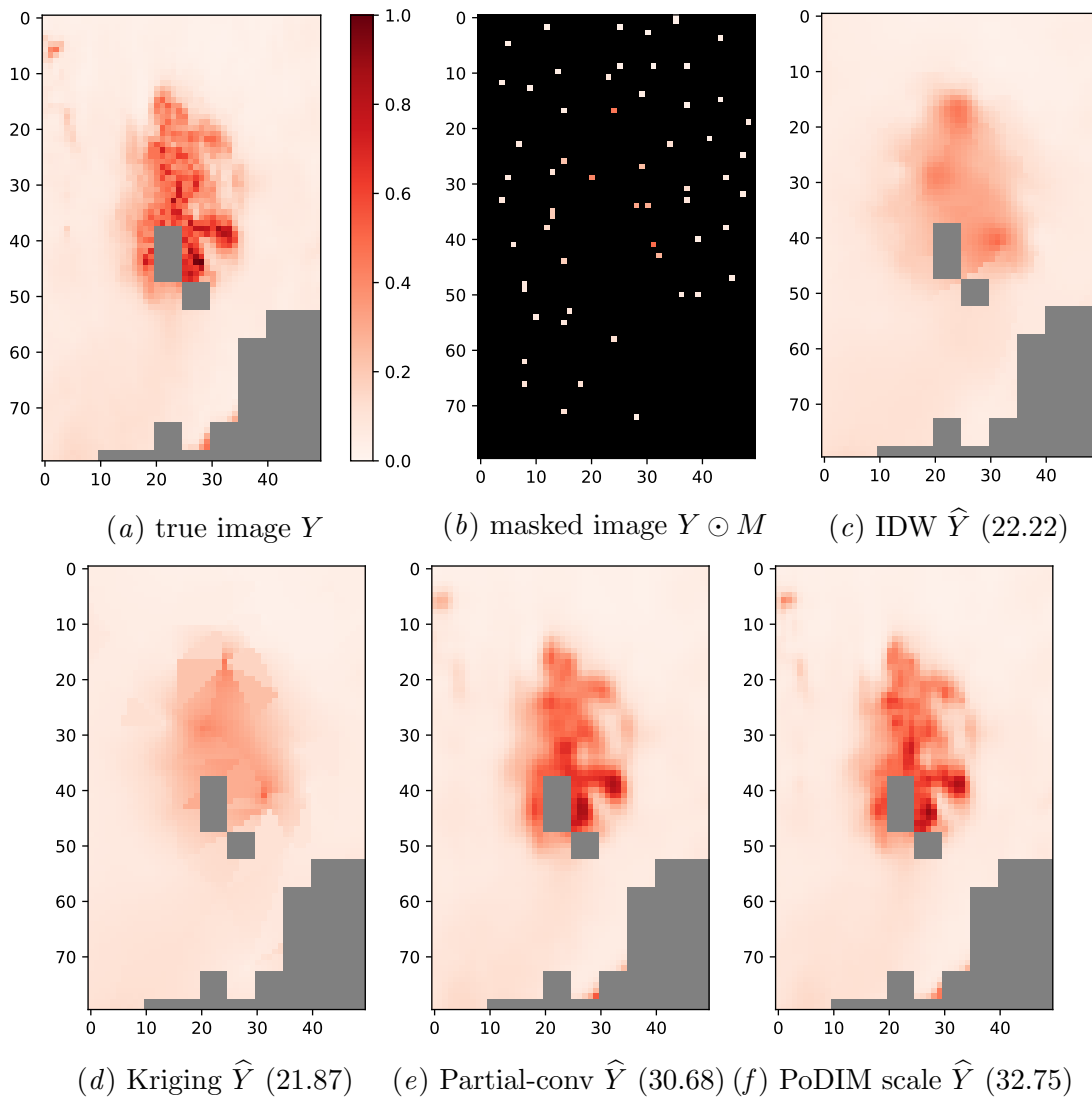

Figure 7: Examples of enlarged version of Fig. 7 in the manuscript for Nagoya region in Japan

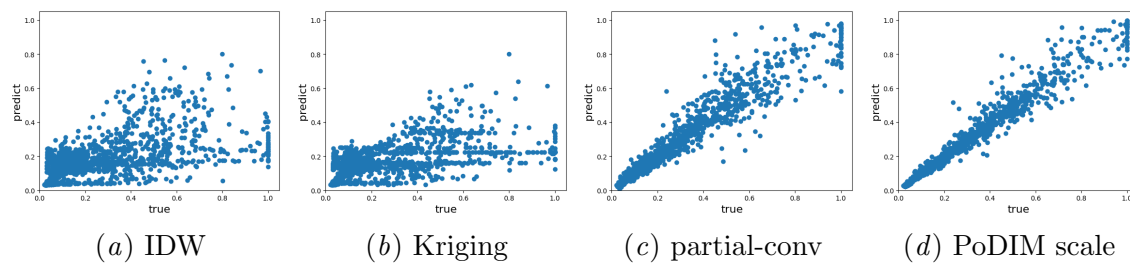

Figure 8: True vs. predicted values for Fig. 7.
